# Supplementary material for: Large-scale direct regeneration of LiFePO 4 @C based on spray drying
Source: Royal Society of Chemistry journal article supplement (doi:10.1039/d2im00007e), 2022-12-13
Supplement: d2im00007e1.pdf [file d2im00007e1.pdf]

## Supporting Information

### Large-scale direct regeneration of $\text{LiFePO}_4@C$ based on spray drying

Yongxing Zou,<sup>ab</sup> Jinwei Cao,<sup>ab</sup> Hao Li,<sup>ab</sup> Wanbao Wu,<sup>ab</sup> Yihong Liang<sup>ab</sup> and Jiaheng Zhang<sup>\*ab</sup>

<sup>a</sup> Sauvage Laboratory for Smart Materials, Harbin Institute of Technology (Shenzhen) Shenzhen 518055, China

<sup>b</sup> Research Centre of Printed Flexible Electronics, School of Materials Science and Engineering, Harbin Institute of Technology (Shenzhen) Shenzhen 518055, China

\*Zhang Jiaheng: [zhangjiaheng@hit.edu.cn](mailto:zhangjiaheng@hit.edu.cn);

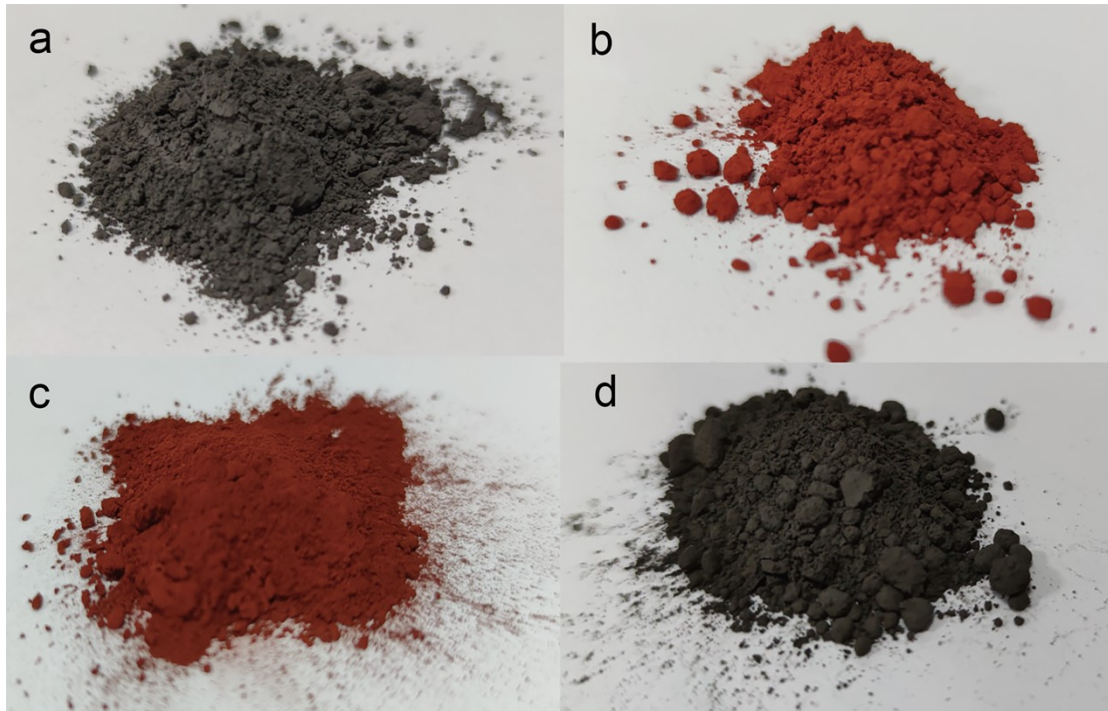

**Fig. S1.** Photograph of (a) spent, (b) homogenized, (c) spray-dried and (d) regenerated  $\text{LiFePO}_4$

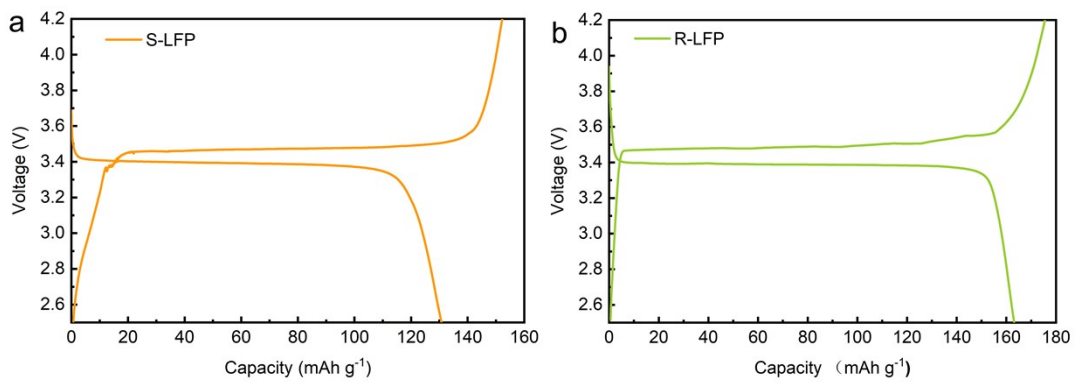

**Fig. S2.** The first turn charge and discharge curve of (a) S-LFP and (b) R-LFP

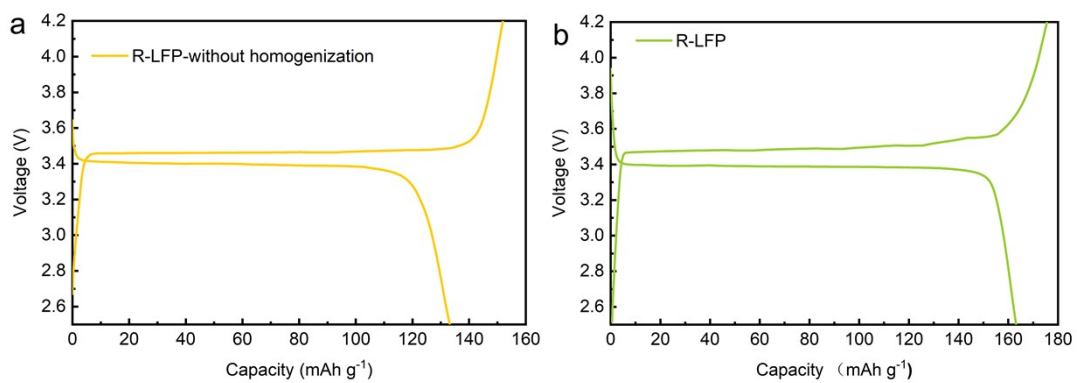

**Fig. S3.** The first turn charge and discharge curve of (a) R-LFP-without homogenization and (b) R-LFP

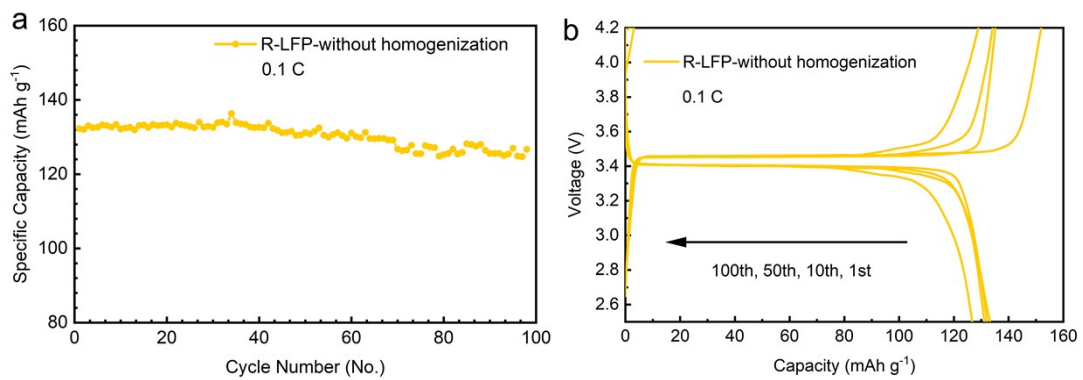

**Fig. S4.** (a) Charge-discharge curves and (b) Long-term cycling stability of R-LFP without homogenization.

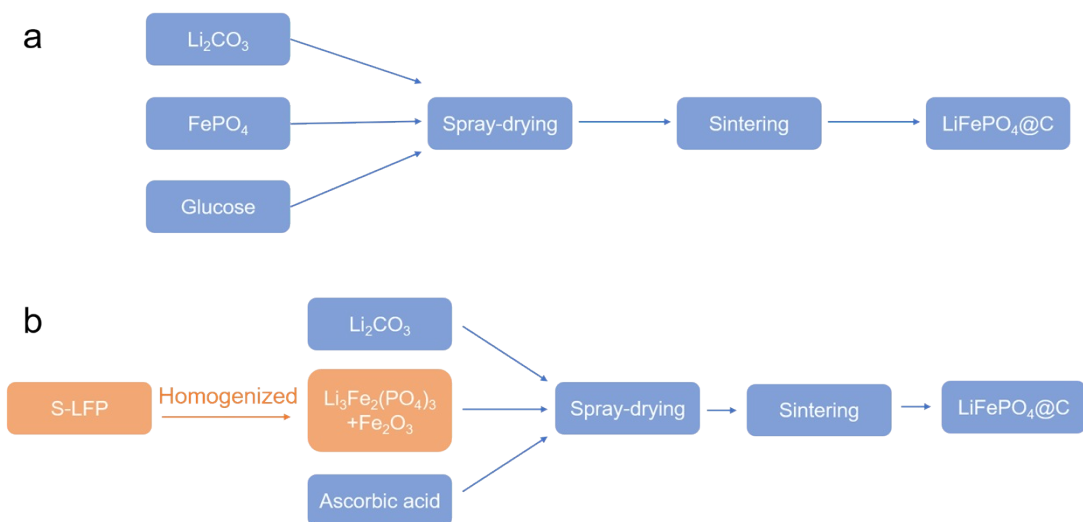

**Fig. S5.** Process flow diagrams of (a) LFP materials preparation (b) LFP recycling

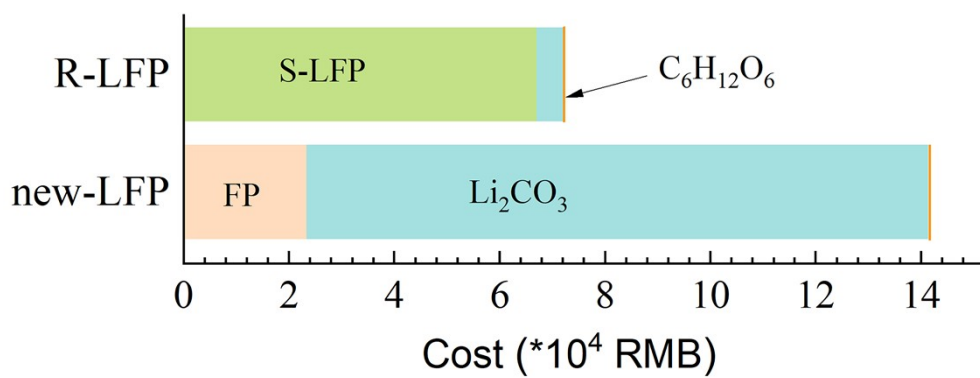

**Fig. S6.** The cost comparison between R-LFP and solid state synthesis LFP

**Table S1**

### XPS elemental composition

| Mass ratio /% | Fe   | O     | P    | C     |
|---------------|------|-------|------|-------|
| S-LFP         | 4.23 | 32.39 | 5.34 | 58.04 |
| Homo-LFP      | 5.11 | 38.86 | 7.34 | 48.69 |
| R-LFP         | 1.31 | 14.61 | 1.12 | 82.96 |

### Table S2

#### ICP-MS results of spent lithium iron phosphate

| Elemental types | Mass fraction (wt%) | Amount of substance per<br>kg (mol/kg) |
|-----------------|---------------------|----------------------------------------|
| Fe              | 34.53%              | 6.183935                               |
| Li              | 4.41%               | 6.356335                               |
| P               | 15.58%              | 6.029794                               |

**Table S3**

The raw materials cost breakdown of R-LFP and solid state synthesis LFP

| Raw materials cost of production of 1 ton R-LFP |                                       |                   |                                  | Raw materials cost of production of 1 ton of LFP via solid state synthesis |                                        |                   |                                  |
|-------------------------------------------------|---------------------------------------|-------------------|----------------------------------|----------------------------------------------------------------------------|----------------------------------------|-------------------|----------------------------------|
| raw materials                                   | unit price<br>(*10 <sup>4</sup> yuan) | quantity<br>(ton) | cost (<br>*10 <sup>4</sup> yuan) | raw materials                                                              | unit price (<br>*10 <sup>4</sup> yuan) | quantity<br>(ton) | cost (<br>*10 <sup>4</sup> yuan) |
| S-LFP                                           | 6.71                                  | 1                 | 6.71                             | iron phosphate<br>(FP)                                                     | 2.45                                   | 0.956             | 2.3422                           |
| Li <sub>2</sub> CO <sub>3</sub>                 | 50.5                                  | 0.01              | 0.505                            | Li <sub>2</sub> CO <sub>3</sub>                                            | 50.5                                   | 0.234             | 11.817                           |
| glucose                                         | 0.27                                  | 0.07              | 0.0189                           | glucose                                                                    | 0.27                                   | 0.07              | 0.0189                           |
| SUM                                             |                                       |                   | 7.2339                           | SUM                                                                        |                                        |                   | 14.1781                          |

**Economic and Environment Analysis**

We have carefully considered the cost of this regeneration method. The current market price of LFP raw material is ¥157,500 per ton, the price of S-LFP black powder is ¥66,100 per ton, the price of lithium carbonate is ¥505,000 per ton, the price of iron phosphate (FP) is ¥24,500 per ton, and the price of food grade glucose is ¥2,700 per ton. To obtain 1 ton of recycled lithium iron phosphate, we need approximately 1t of S-LFP black powder, 0.01t of lithium carbonate, and 0.07t of glucose. After calculation, the cost of regenerating 1t of lithium iron phosphate material is ¥72,339 per ton, which is approximately 51.02% of the marketed LFP. The regeneration process is also close to the current lithium iron phosphate manufacturing process, enabling direct use of existing equipment for production and reducing upfront investment costs, with the potential for industrial production.
